# Supplementary material for: Inner Obstacles and Goal-Directed Behaviors of Elite and Youth-Level Cyclists
Source: Atypon-hosted journal article supplement (doi:10.1026/2941-7597/a000002), 2023-12-22
Supplement: 2941-7597_a000002_esm3.pdf [file 2941-7597_a000002_esm3.pdf]

**ESM 3. Figure S1.** Illustration of the frequencies of (A) inner obstacles and (B) goal-directed behaviors per competitive discipline (coaches: primarily trained discipline) from the perspective of athletes (Study 1) and coaches (Study 2).

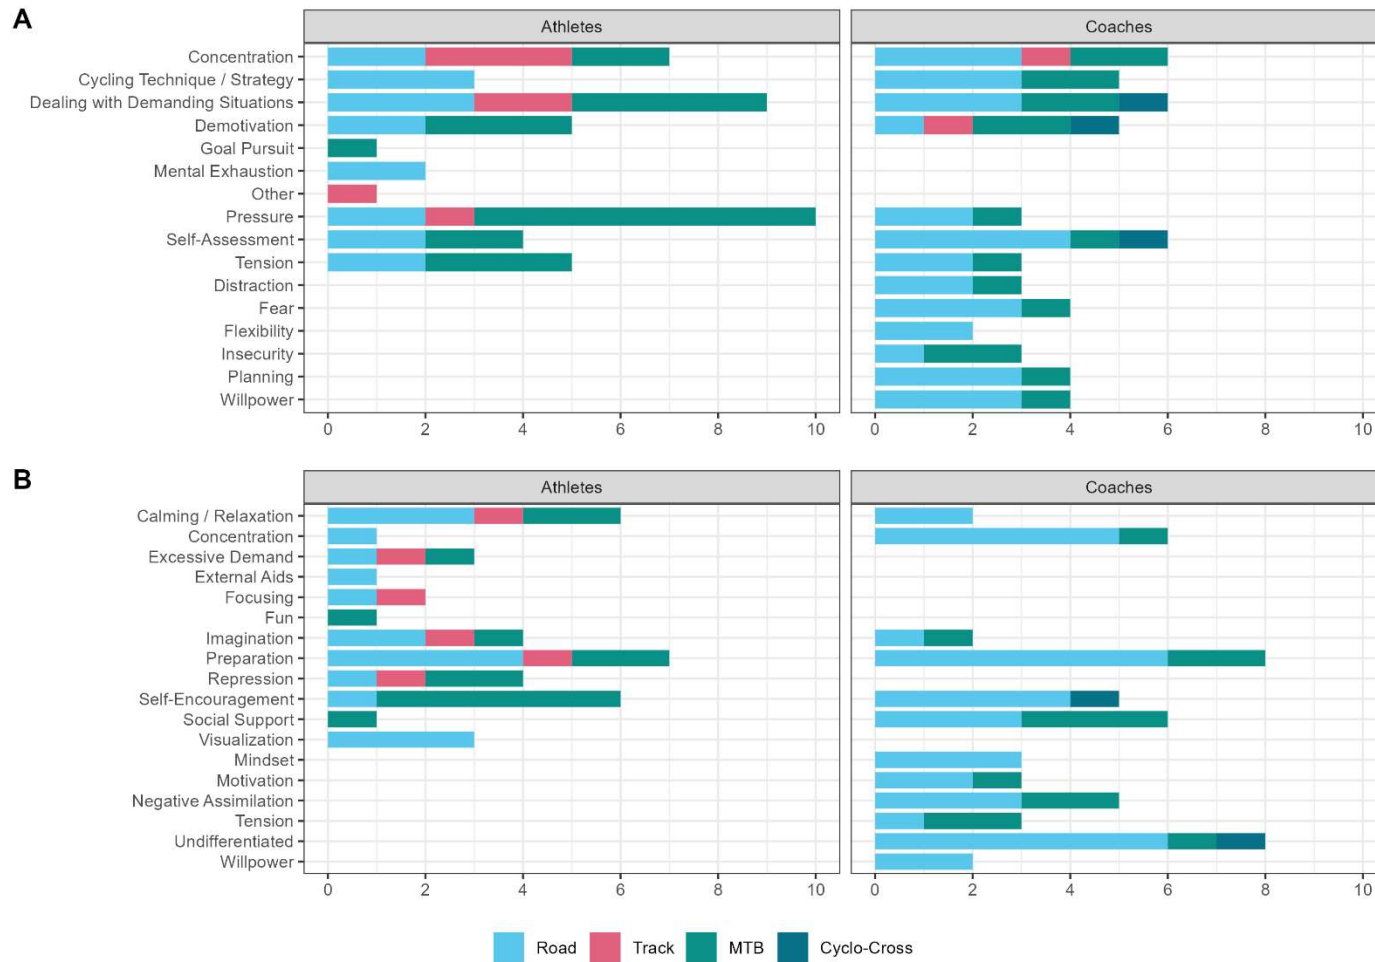

*Note.* Abbreviations: MTB = Mountain biking. NAs were excluded when coaches did not commit to one primarily trained discipline.
