# Supplementary material for: Inner Obstacles and Goal-Directed Behaviors of Elite and Youth-Level Cyclists
Source: Atypon-hosted journal article supplement (doi:10.1026/2941-7597/a000002), 2023-12-22
Supplement: 2941-7597_a000002_esm4.pdf [file 2941-7597_a000002_esm4.pdf]

**ESM 4. Figure S2.** Illustration of the frequencies of (A) athletes' inner obstacles and (B) goal-directed behaviors per performance level.

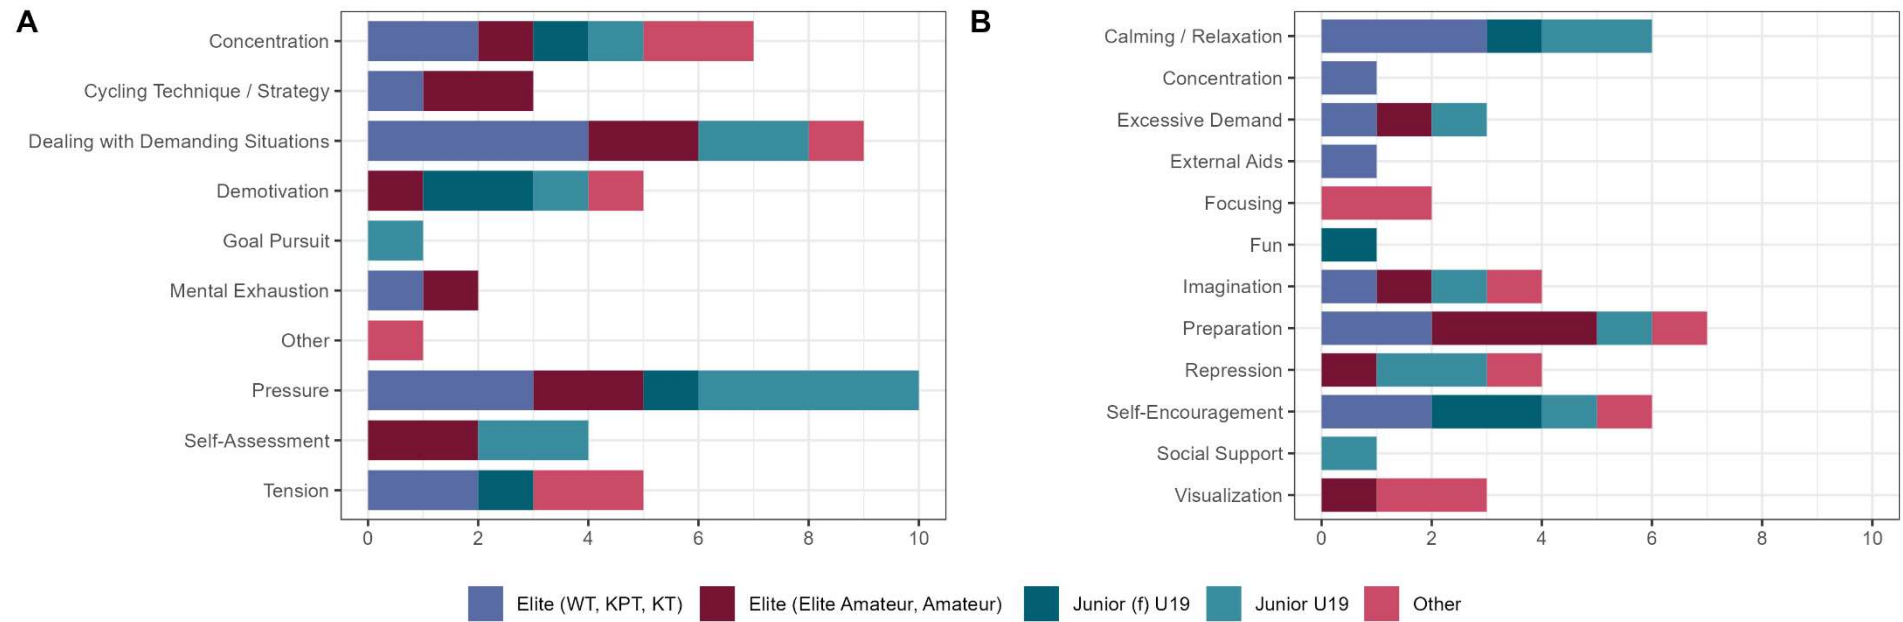

*Note.* Abbreviations: WT = World Tour, KPT = Continental Professional Team, KT = Continental Team. As coaches were allowed to indicate multiple performance levels, this graph shows only the athletes' responses as they can be attributed to inner obstacles and goal-directed behaviors.
